# Supplementary material for: Generation and nature of water-tolerant Lewis acid sites in InxSn10−xOy/Al2O3 catalysts as active centers for the green synthesis of methyl lactate from glucose
Source: Royal Society of Chemistry journal article supplement (doi:10.1039/d2qi02338e), 2023-01-01
Supplement: d2qi02338e1.pdf [file d2qi02338e1.pdf]

Electronic Supplementary Material (ESI) for Inorganic Chemistry Frontiers.

This journal is © The Royal Society of Chemistry 2022

**Electronic Supplementary Information for**

**Generation and nature of water-tolerant Lewis acid sites**

**in  $\text{In}_x\text{Sn}_{10-x}\text{O}_y/\text{Al}_2\text{O}_3$  catalyst as active centers for green**

**synthesis of methyl lactate from glucose**

*Zhenxiang Zhao<sup>a</sup>, Jun Yang<sup>a</sup>, Ningkun Xu<sup>a</sup>, Tian Nan<sup>a</sup>, Pingping Wu<sup>a</sup>, Chunzheng Wang<sup>a</sup>, Xiaohua Wang<sup>b</sup>, Peng Bai<sup>a,\*</sup>, Zifeng Yan<sup>a</sup> and Svetlana Mintova<sup>a,c</sup>*

<sup>a</sup> State Key Laboratory of Heavy Oil Processing, CNPC Key Laboratory of Catalysis, College of Chemistry and Chemical Engineering, China University of Petroleum (East China), Qingdao 266580, China

<sup>b</sup> Petrochemical Research Institute, PetroChina Company Limited, Beijing 100195, China

<sup>c</sup> Normandie University, ENSICAEN, UNICAEN, CNRS, Laboratoire Catalyse et Spectrochimie, 14000 Caen, France

\* Corresponding authors. Tel: +86-532-86981812;

*E-mail address: [baipeng@upc.edu.cn](mailto:baipeng@upc.edu.cn) (P. Bai)*

**Table S1.** Preparation details of catalysts.

| Sample name                                                                    | M/Al <sup>a</sup> | In/Sn <sup>b</sup> | Metal precursor                                                         | Solvent          |
|--------------------------------------------------------------------------------|-------------------|--------------------|-------------------------------------------------------------------------|------------------|
| In/Al <sub>2</sub> O <sub>3</sub>                                              | 0.1               | -                  | In(NO <sub>3</sub> ) <sub>3</sub>                                       | ethanol          |
| In <sub>9</sub> Sn <sub>1</sub> O <sub>y</sub> /Al <sub>2</sub> O <sub>3</sub> | 0.1               | 9/1                | In(NO <sub>3</sub> ) <sub>3</sub> +SnCl <sub>2</sub> ·2H <sub>2</sub> O | ethanol          |
| In <sub>8</sub> Sn <sub>2</sub> O <sub>y</sub> /Al <sub>2</sub> O <sub>3</sub> | 0.1               | 8/2                | In(NO <sub>3</sub> ) <sub>3</sub> +SnCl <sub>2</sub> ·2H <sub>2</sub> O | ethanol          |
| In <sub>7</sub> Sn <sub>3</sub> O <sub>y</sub> /Al <sub>2</sub> O <sub>3</sub> | 0.1               | 7/3                | In(NO <sub>3</sub> ) <sub>3</sub> +SnCl <sub>2</sub> ·2H <sub>2</sub> O | ethanol          |
| Sn <sub>II</sub> /Al <sub>2</sub> O <sub>3</sub>                               | 0.1               | 0                  | SnCl <sub>2</sub> ·2H <sub>2</sub> O                                    | ethanol          |
| Sn <sub>IV</sub> /Al <sub>2</sub> O <sub>3</sub>                               | 0.1               | -                  | SnCl <sub>4</sub>                                                       | H <sub>2</sub> O |

<sup>a</sup> The molar ratio of active metal to Al (M are the metals); <sup>b</sup> The molar ratio of In to Sn.

**Table S2.** Textural properties of catalysts.

| Sample name                                              | $S_{\text{BET}}$<br>( $\text{m}^2 \cdot \text{g}^{-1}$ ) | Pore size<br>(nm) | Pore volume<br>( $\text{cm}^3 \cdot \text{g}^{-1}$ ) |
|----------------------------------------------------------|----------------------------------------------------------|-------------------|------------------------------------------------------|
| $\text{Al}_2\text{O}_3$                                  | 246.7±5.6                                                | 12.3±0.1          | 1.03±0.03                                            |
| $\text{In}/\text{Al}_2\text{O}_3$                        | 199.6±2.4                                                | 12.3±0.1          | 0.78±0.04                                            |
| $\text{In}_9\text{Sn}_1\text{O}_y/\text{Al}_2\text{O}_3$ | 188.2±3.2                                                | 12.2±0.2          | 0.73±0.03                                            |
| $\text{In}_7\text{Sn}_3\text{O}_y/\text{Al}_2\text{O}_3$ | 194.1±4.3                                                | 12.3±0.2          | 0.52±0.05                                            |
| $\text{In}_5\text{Sn}_5\text{O}_y/\text{Al}_2\text{O}_3$ | 190.9±5.5                                                | 12.3±0.3          | 0.67±0.02                                            |
| $\text{Sn}_{11}/\text{Al}_2\text{O}_3$                   | 185.4±6.5                                                | 12.3±0.2          | 0.69±0.03                                            |

**Table S3.** Weight loss of catalysts at different temperatures after adsorption of glucose or after the reaction.<sup>a</sup>

|                                                                                | Weight loss of catalyst (%) <sup>b</sup> | Weight loss of catalyst after adsorption (%) <sup>c</sup> | Residual organics (%) <sup>d</sup> |
|--------------------------------------------------------------------------------|------------------------------------------|-----------------------------------------------------------|------------------------------------|
| Al <sub>2</sub> O <sub>3</sub>                                                 | 2.39                                     | 5.12                                                      | 20.30±0.34                         |
| Sn <sub>IV</sub> /Al <sub>2</sub> O <sub>3</sub>                               | 2.73                                     | 3.38                                                      | 13.79±0.45                         |
| In/Al <sub>2</sub> O <sub>3</sub>                                              | 2.38                                     | 2.82                                                      | 7.48±0.44                          |
| In <sub>9</sub> Sn <sub>1</sub> O <sub>y</sub> /Al <sub>2</sub> O <sub>3</sub> | 2.76                                     | 3.58                                                      | 5.67±0.45                          |
| In <sub>7</sub> Sn <sub>3</sub> O <sub>y</sub> /Al <sub>2</sub> O <sub>3</sub> | 3.05                                     | 2.30                                                      | 6.74±0.51                          |
| In <sub>5</sub> Sn <sub>5</sub> O <sub>y</sub> /Al <sub>2</sub> O <sub>3</sub> | 2.60                                     | 3.38                                                      | 9.12±0.45                          |
| Sn <sub>II</sub> /Al <sub>2</sub> O <sub>3</sub>                               | 3.16                                     | 0.26                                                      | 5.72±0.32                          |

<sup>a</sup>:all data based on TGA analysis; <sup>b</sup> mass of catalyst (100 °C)- mass of catalyst (800 °C); <sup>c</sup>:mass of catalyst after adsorption (100 °C)- mass of catalyst after adsorption (800 °C)- weight loss of catalyst; <sup>d</sup> mass of catalyst after reaction (100 °C)- mass of catalyst after reaction (800 °C)- weight loss of catalyst.

**Table S4.** Reaction conditions and MLA yields of catalyst reported earlier.

| Catalyst                          | Temperature |          | MLA Yield |    | Ref. |
|-----------------------------------|-------------|----------|-----------|----|------|
|                                   | (°C)        | Time (h) | (%)       |    |      |
| NaOH+[IMEP]Cl                     | 100         | 0.5      | 63        | 1  |      |
| KOH+[IMEP]Cl                      | 100         | 0.5      | 65.5      | 1  |      |
| NH <sub>4</sub> OH+[IMEP]Cl       | 100         | 0.5      | 7         | 1  |      |
| Ca(OH) <sub>2</sub> + [IMEP]Cl    | 100         | 0.5      | 21        | 1  |      |
| Ba(OH) <sub>2</sub> + [IMEP]Cl    | 100         | 0.5      | 26        | 1  |      |
| NaOH+[IMEP]BF <sub>4</sub>        | 100         | 0.5      | 58.1      | 1  |      |
| NaOH+[IMEP]ClO <sub>4</sub>       | 100         | 0.5      | 50.1      | 1  |      |
| NaOH+[IMEP]Ac                     | 100         | 0.5      | 44.8      | 1  |      |
| NaOH+[IMEP]PF <sub>6</sub>        | 100         | 0.5      | 9.5       | 1  |      |
| NaOH+[IMEP]PhCOO                  | 100         | 0.5      | 33.2      | 1  |      |
| Co(NO <sub>3</sub> ) <sub>2</sub> | 200         | 1        | 14.3      | 2  |      |
| Ba(OH) <sub>2</sub>               | 25          | 48       | 95.4      | 3  |      |
| Sn-BEA                            | 160         | 20       | 43        | 4  |      |
| Sn-BEA                            | 160         | 16       | 52        | 5  |      |
| Sn-BEA                            | 160         | 10       | 45        | 6  |      |
| Sn-BEA                            | 160         | 8        | >55       | 7  |      |
| Sn-BEA                            | 160         | 20       | 52.5      | 8  |      |
| Sn-BEA                            | 160         | 10       | 58        | 9  |      |
| Al <sub>2</sub> O <sub>3</sub>    | 160         | 6        | 34        | 10 |      |

|                                                                                |     |    |          |           |
|--------------------------------------------------------------------------------|-----|----|----------|-----------|
| ZrO <sub>2</sub>                                                               | 160 | 6  | 6        | 10        |
| TiO <sub>2</sub>                                                               | 160 | 6  | 10       | 10        |
| CeO <sub>2</sub>                                                               | 160 | 6  | 14       | 10        |
| Al <sub>2</sub> O <sub>3</sub>                                                 | 180 | 5  | 21       | 11        |
| In <sub>2</sub> O <sub>3</sub>                                                 | 180 | 12 | 14       | 11        |
| In/Al <sub>2</sub> O <sub>3</sub>                                              | 180 | 12 | 42       | 11        |
| In/Al <sub>2</sub> O <sub>3</sub> +K <sub>2</sub> CO <sub>3</sub>              | 180 | 12 | 49       | 11        |
| La <sub>2</sub> O <sub>3</sub>                                                 | 200 | 1  | 18.8     | 2         |
| Co <sub>2</sub> O <sub>3</sub>                                                 | 200 | 1  | 31.3     | 2         |
| LaCoO <sub>3</sub>                                                             | 200 | 1  | 39.5     | 2         |
| SnO <sub>2</sub>                                                               | 160 | 6  | 1        | 10        |
| Al <sub>2</sub> O <sub>3</sub>                                                 | 160 | 10 | 25.9±1.6 | This work |
| In/Al <sub>2</sub> O <sub>3</sub>                                              | 160 | 10 | 47.8±1.3 | This work |
| In <sub>9</sub> Sn <sub>1</sub> O <sub>y</sub> /Al <sub>2</sub> O <sub>3</sub> | 160 | 10 | 31.9±1.3 | This work |
| In <sub>7</sub> Sn <sub>3</sub> O <sub>y</sub> /Al <sub>2</sub> O <sub>3</sub> | 160 | 10 | 57.6±1.2 | This work |
| In <sub>5</sub> Sn <sub>5</sub> O <sub>y</sub> /Al <sub>2</sub> O <sub>3</sub> | 160 | 10 | 41.3±1.0 | This work |
| Sn <sub>II</sub> /Al <sub>2</sub> O <sub>3</sub>                               | 160 | 10 | 19.2±1.2 | This work |
| Sn <sub>IV</sub> /Al <sub>2</sub> O <sub>3</sub>                               | 160 | 10 | 28.3±1.1 | This work |

**Table S5.** Regeneration-reaction cycle stability of catalysts.

| Entry | Catalyst                                                                                    | MLA yield    | Ref.      |
|-------|---------------------------------------------------------------------------------------------|--------------|-----------|
| 1     | In <sub>7</sub> Sn <sub>3</sub> O <sub>y</sub> /Al <sub>2</sub> O <sub>3</sub> <sup>a</sup> | 57.6 %±1.2 % | This work |
| 2     | In <sub>7</sub> Sn <sub>3</sub> O <sub>y</sub> /Al <sub>2</sub> O <sub>3</sub> <sup>b</sup> | 59.4 %±1.8 % | This work |

|   |                                                                                             |              |           |
|---|---------------------------------------------------------------------------------------------|--------------|-----------|
| 3 | In <sub>7</sub> Sn <sub>3</sub> O <sub>y</sub> /Al <sub>2</sub> O <sub>3</sub> <sup>c</sup> | 53.0 %±1.3 % | This work |
| 4 | Al <sub>2</sub> O <sub>3</sub> <sup>a</sup>                                                 | 25.9 %±1.6 % | This work |
| 5 | Al <sub>2</sub> O <sub>3</sub> <sup>b</sup>                                                 | 6.5 %±1.5 %  | This work |
| 6 | Al <sub>2</sub> O <sub>3</sub> <sup>a</sup>                                                 | 34 %         | 10        |
| 7 | Al <sub>2</sub> O <sub>3</sub> <sup>b</sup>                                                 | 25 %         | 10        |
| 8 | Al <sub>2</sub> O <sub>3</sub> <sup>c</sup>                                                 | 21 %         | 10        |

<sup>a</sup> 1<sup>st</sup> use; <sup>b</sup> 2<sup>nd</sup> use; <sup>c</sup> 3<sup>rd</sup> use;

**Table S6.** Amount of LAS of catalysts measured by NH<sub>3</sub>-TPD.

| Sample name                                                                    | Acid (μmol/g) <sup>a</sup> |
|--------------------------------------------------------------------------------|----------------------------|
| In <sub>7</sub> Sn <sub>3</sub> O <sub>y</sub> /Al <sub>2</sub> O <sub>3</sub> | 269.47±13                  |
| In/Al <sub>2</sub> O <sub>3</sub>                                              | 363.59±14                  |

<sup>a</sup> The acid amount was calculated based on the measure results of NH<sub>3</sub>-TPD.

**Table S7.** Adsorption energies calculated for samples In<sub>7</sub>Sn<sub>3</sub>O<sub>y</sub> and In<sub>2</sub>O<sub>3</sub>.

|                                                | E <sub>surface</sub><br>(Ha) | E <sub>adsorbate</sub><br>(Ha) | E <sub>adsorbate/surface</sub><br>(Ha) | E <sub>ads</sub><br>(Ha) | E <sub>ads</sub><br>(eV) | E <sub>ads</sub><br>(kcal/mol) |
|------------------------------------------------|------------------------------|--------------------------------|----------------------------------------|--------------------------|--------------------------|--------------------------------|
| In <sub>7</sub> Sn <sub>3</sub> O <sub>y</sub> | -16788.058                   | -686.691                       | -17474.7491                            | -0.05385                 | -1.46542                 | -33.8                          |
| In <sub>2</sub> O <sub>3</sub>                 | -16630.992                   | -686.691                       | -17317.68307                           | -0.03086                 | -0.83988                 | -19.4                          |

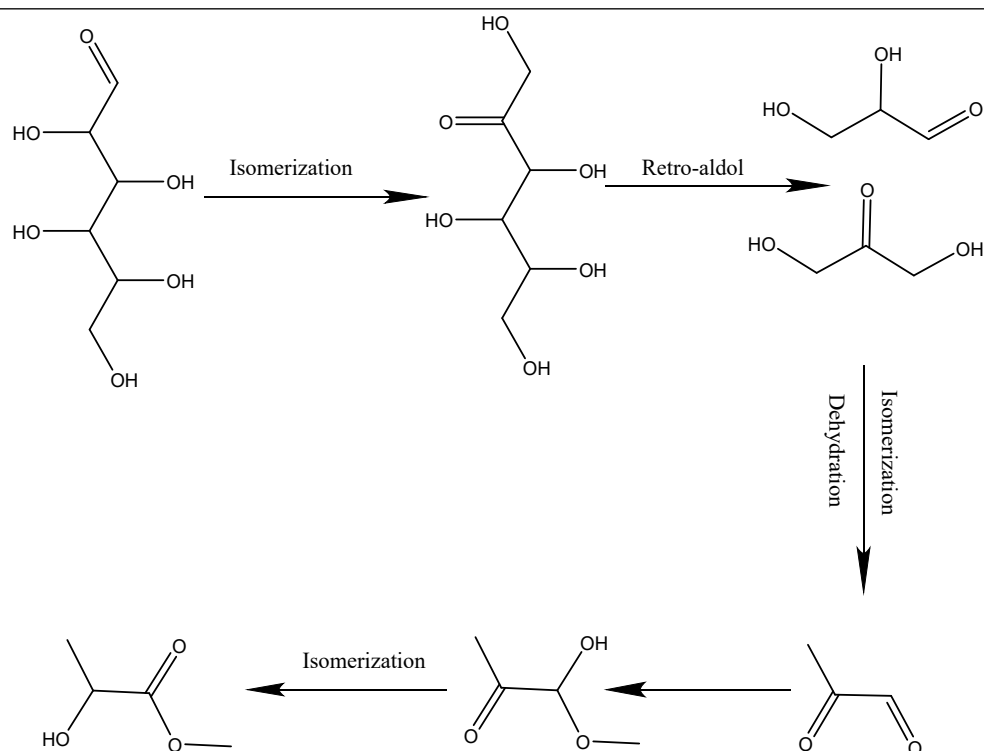

**Fig. S1** The conversion process of glucose to MLA.

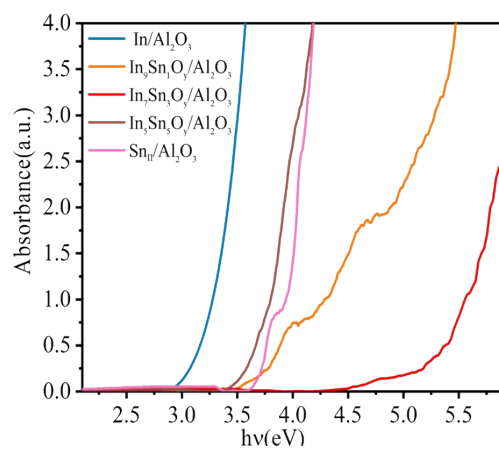

**Fig. S2** Band gap analysis of In/Al<sub>2</sub>O<sub>3</sub>, In<sub>9</sub>Sn<sub>1</sub>O<sub>y</sub>/Al<sub>2</sub>O<sub>3</sub>, In<sub>7</sub>Sn<sub>3</sub>O<sub>y</sub>/Al<sub>2</sub>O<sub>3</sub>,

In<sub>5</sub>Sn<sub>5</sub>O<sub>y</sub>/Al<sub>2</sub>O<sub>3</sub>, Sn<sub>II</sub>/Al<sub>2</sub>O<sub>3</sub> catalysts.



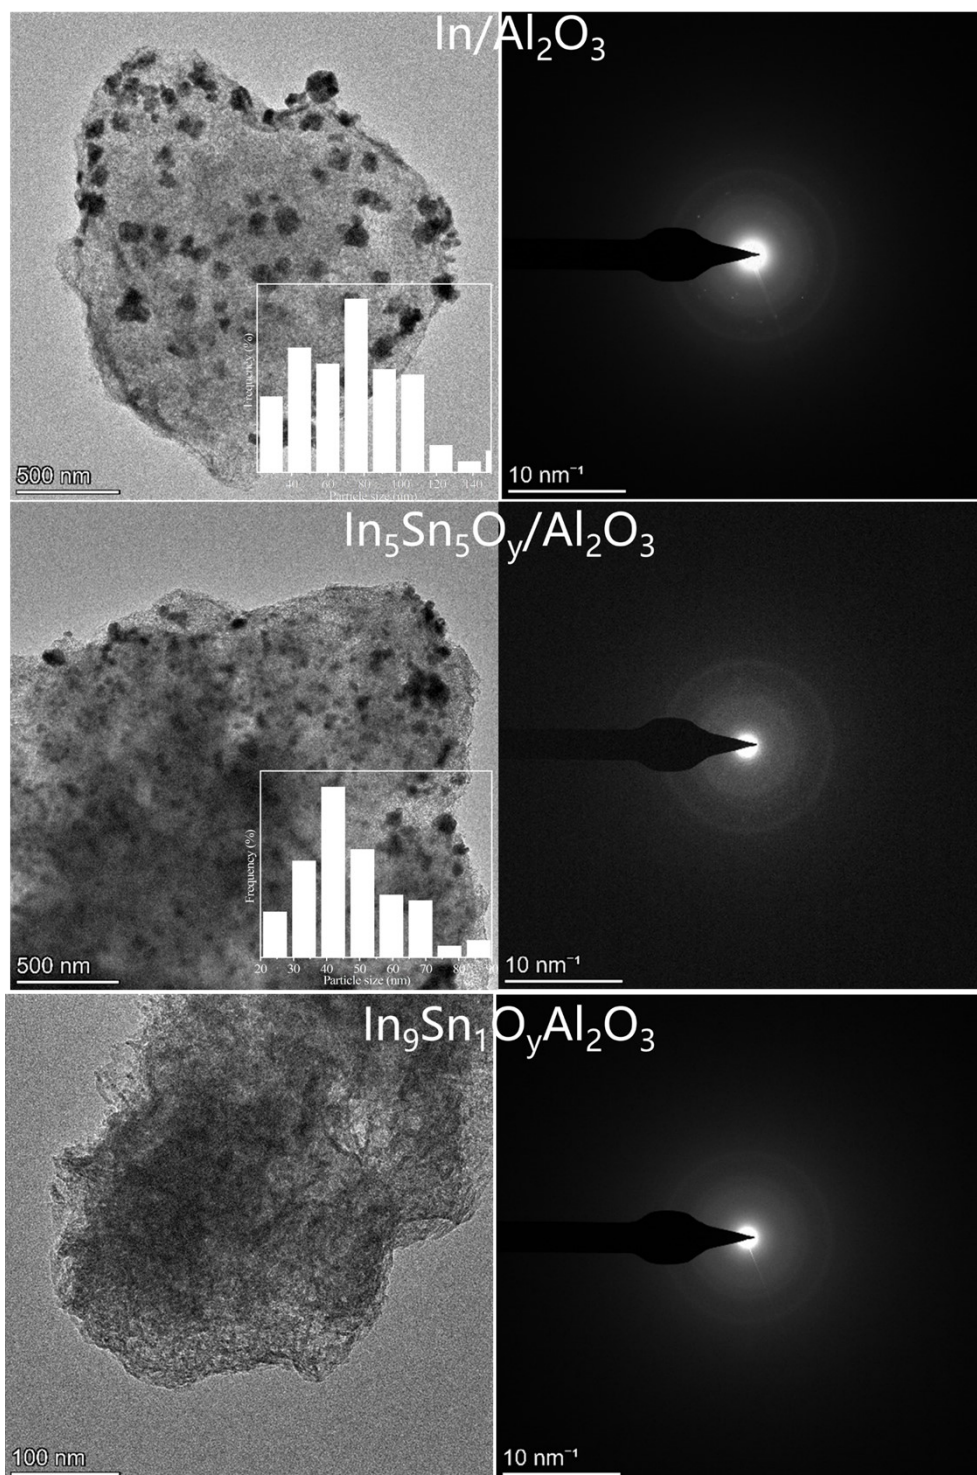

**Fig. S3** TEM images of  $\text{In}/\text{Al}_2\text{O}_3$ ,  $\text{In}_9\text{Sn}_1\text{O}_y/\text{Al}_2\text{O}_3$ ,  $\text{In}_5\text{Sn}_5\text{O}_y/\text{Al}_2\text{O}_3$  catalysts. Insets show the particle size distribution diagrams.

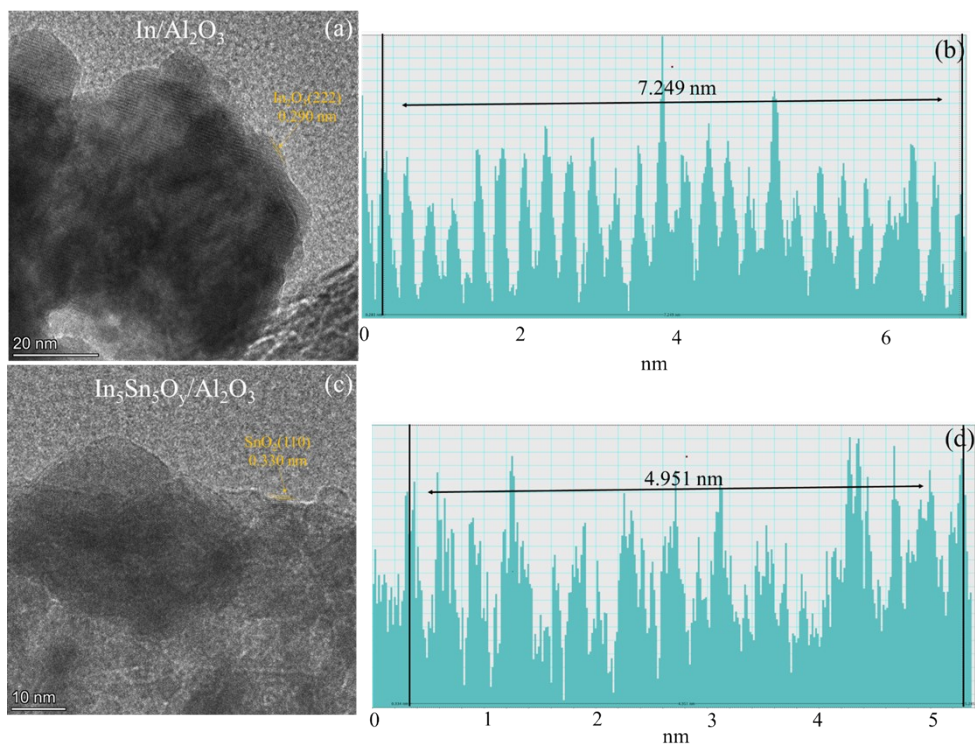

**Fig. S4** HRTEM images of In/Al<sub>2</sub>O<sub>3</sub>(a), In<sub>5</sub>Sn<sub>5</sub>O<sub>y</sub>/Al<sub>2</sub>O<sub>3</sub> (c) and lattice spacings of In/Al<sub>2</sub>O<sub>3</sub> (b), In<sub>5</sub>Sn<sub>5</sub>O<sub>y</sub>/Al<sub>2</sub>O<sub>3</sub> (d).

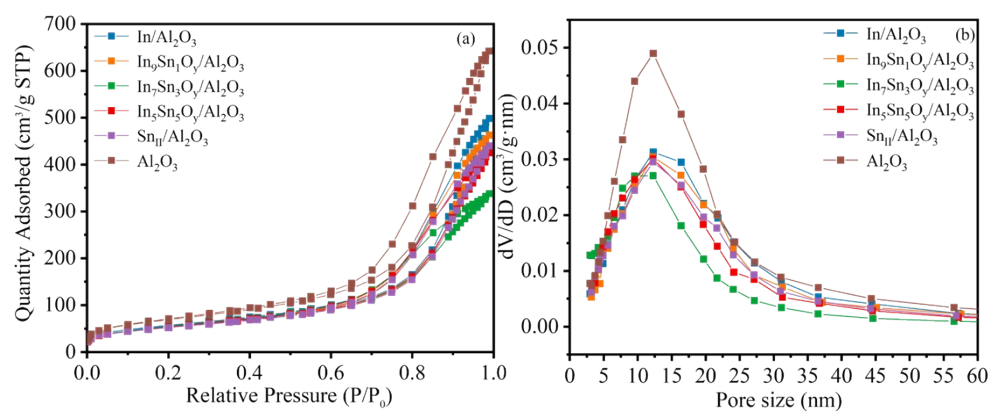

**Fig. S5** Nitrogen adsorption and desorption isotherms (a) and pore size distribution curves (b) of In/Al<sub>2</sub>O<sub>3</sub>, In<sub>9</sub>Sn<sub>1</sub>O<sub>y</sub>/Al<sub>2</sub>O<sub>3</sub>, In<sub>7</sub>Sn<sub>3</sub>O<sub>y</sub>/Al<sub>2</sub>O<sub>3</sub>, In<sub>5</sub>Sn<sub>5</sub>O<sub>y</sub>/Al<sub>2</sub>O<sub>3</sub>, Sn<sub>11</sub>/Al<sub>2</sub>O<sub>3</sub> catalysts.

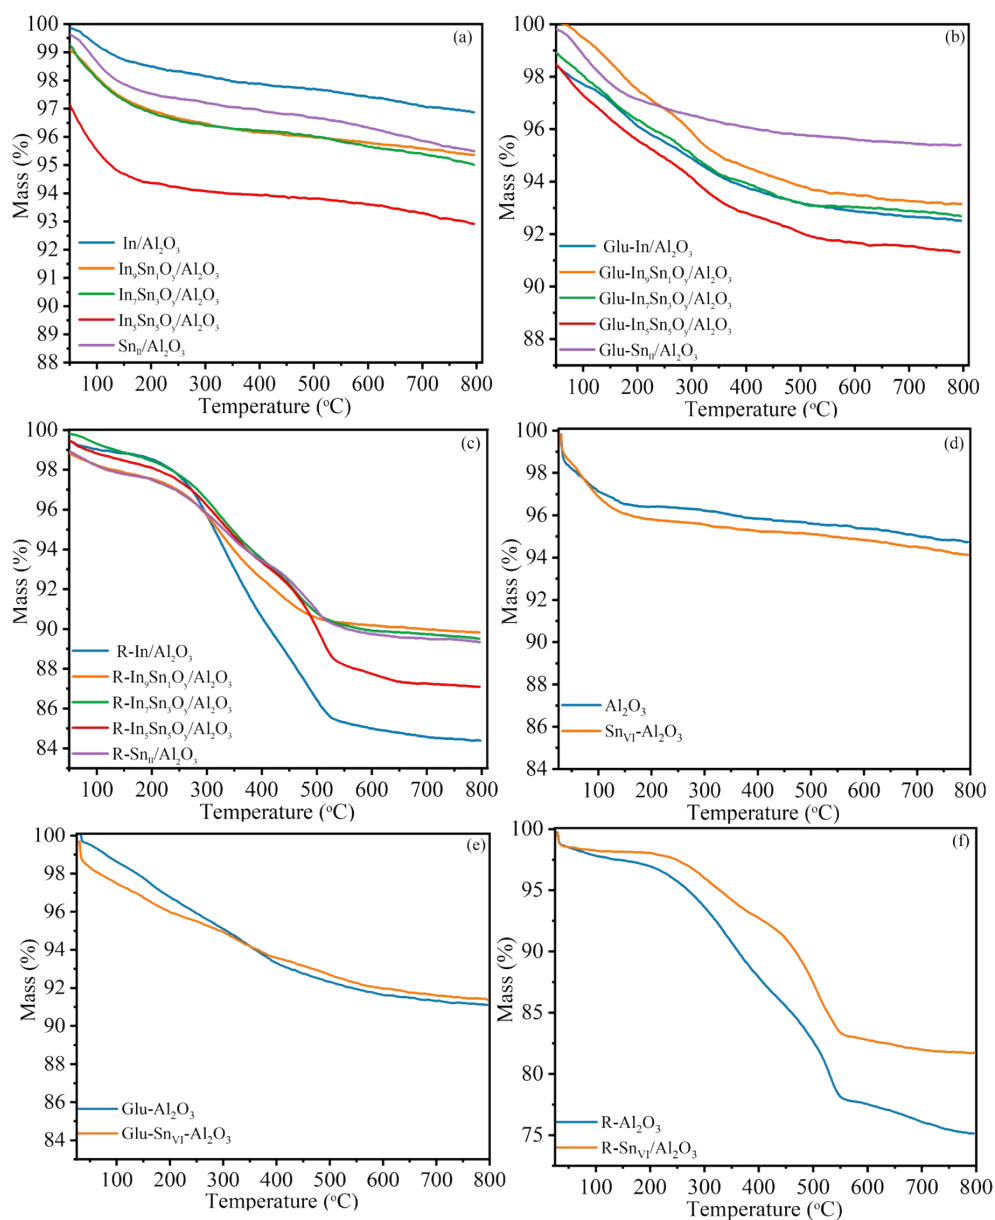

**Fig. S6** TG curves of  $\text{In}_x\text{Sn}_{10-x}\text{O}_y/\text{Al}_2\text{O}_3$  (a),  $\text{In}_x\text{Sn}_{10-x}\text{O}_y/\text{Al}_2\text{O}_3$  after glucose adsorption (b),  $\text{In}_x\text{Sn}_{10-x}\text{O}_y/\text{Al}_2\text{O}_3$  after reaction (c); TG curves of  $\text{M}/\text{Al}_2\text{O}_3$  (d),  $\text{M}/\text{Al}_2\text{O}_3$  after glucose adsorption (e),  $\text{M}/\text{Al}_2\text{O}_3$  after reaction (f).

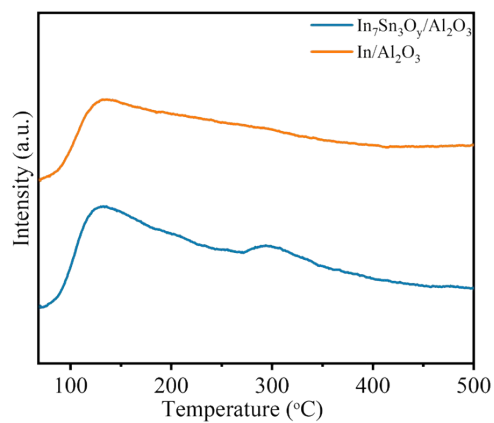

**Fig. S7** NH<sub>3</sub>-TPD profiles of In<sub>7</sub>Sn<sub>3</sub>O<sub>y</sub>/Al<sub>2</sub>O<sub>3</sub>, In/Al<sub>2</sub>O<sub>3</sub> catalysts.

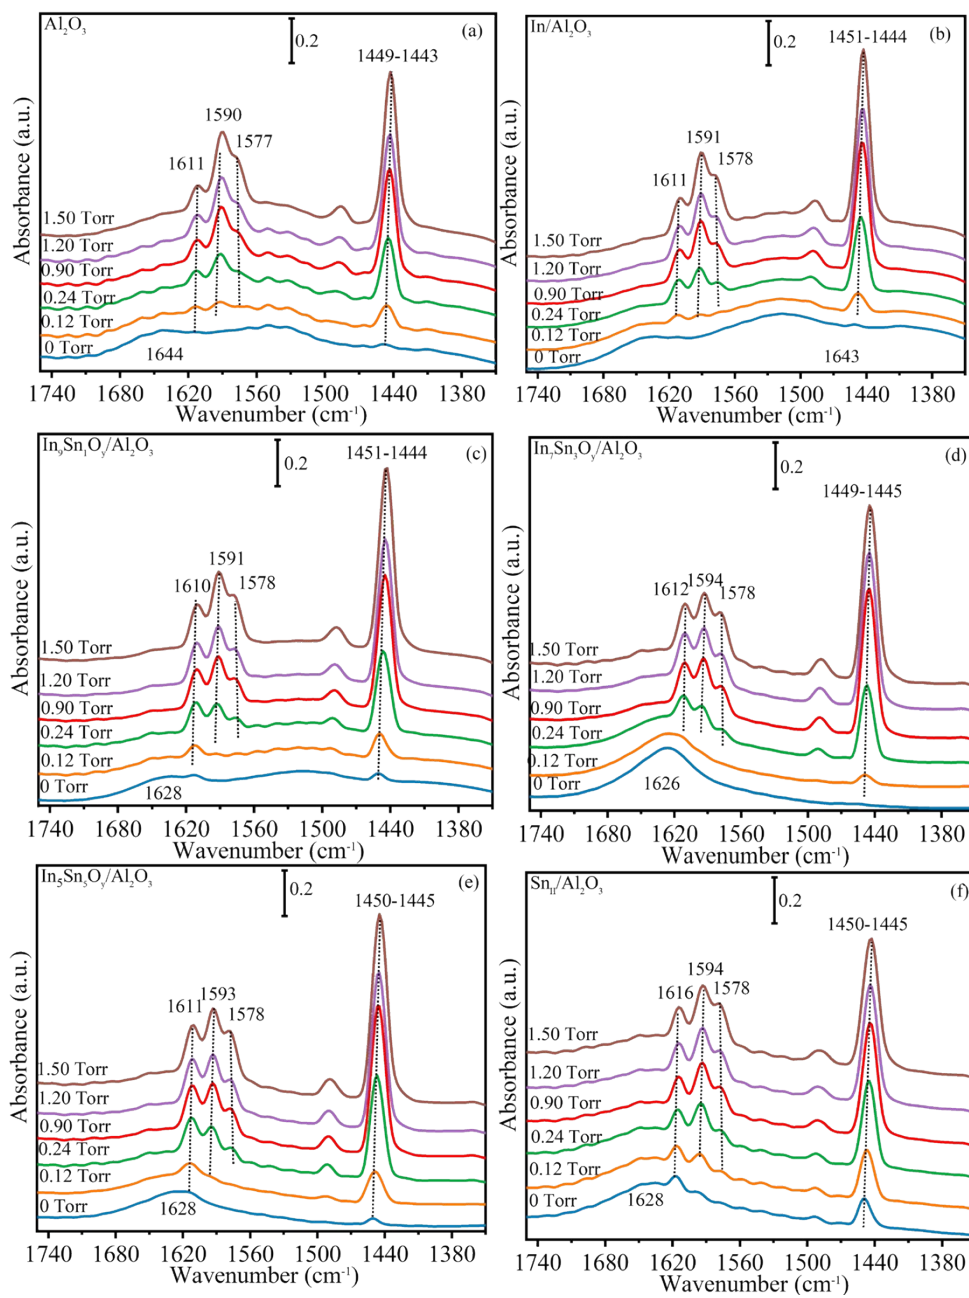

**Fig. S8** FT-IR spectra of competitive adsorption of pyridine and water on  $\text{Al}_2\text{O}_3$ ,  $\text{In}/\text{Al}_2\text{O}_3$ ,  $\text{In}_9\text{Sn}_1\text{O}_y/\text{Al}_2\text{O}_3$ ,  $\text{In}_7\text{Sn}_3\text{O}_y/\text{Al}_2\text{O}_3$ ,  $\text{In}_5\text{Sn}_5\text{O}_y/\text{Al}_2\text{O}_3$ ,  $\text{Sn}_{\text{II}}/\text{Al}_2\text{O}_3$  catalysts.

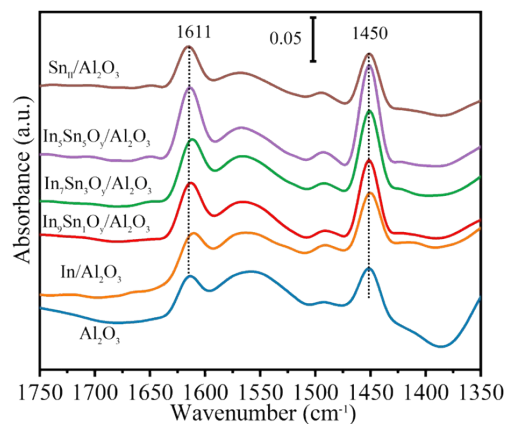

**Fig. S9** Py-FT-IR spectra of  $\text{Al}_2\text{O}_3$ ,  $\text{In}/\text{Al}_2\text{O}_3$ ,  $\text{In}_9\text{Sn}_1\text{O}_y/\text{Al}_2\text{O}_3$ ,  $\text{In}_7\text{Sn}_3\text{O}_y/\text{Al}_2\text{O}_3$ ,  $\text{In}_5\text{Sn}_5\text{O}_y/\text{Al}_2\text{O}_3$ ,  $\text{Sn}_{\text{II}}/\text{Al}_2\text{O}_3$  catalysts.

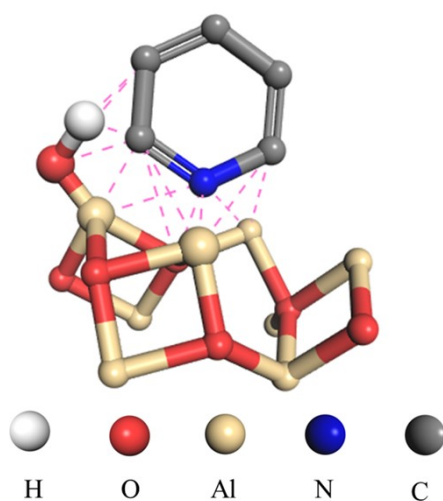

**Fig. S10** pyridine adsorbed on LAS of  $\text{Al}_2\text{O}_3$ .<sup>12</sup>

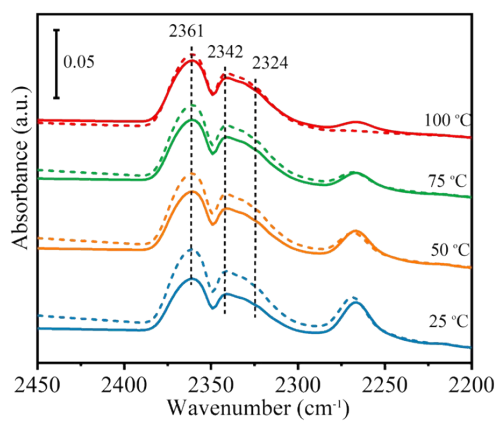

**Fig. S11** IR spectra of  $\text{In}_7\text{Sn}_3\text{O}_y/\text{Al}_2\text{O}_3$  using  $\text{CD}_3\text{CN}$  probe molecule with and without water after desorption at different temperatures. (The spectra have been normalized according to the sample mass. Solid line: pure  $\text{CD}_3\text{CN}$  adsorption; Dotted line:  $\text{CD}_3\text{CN}$  co-adsorption with water)

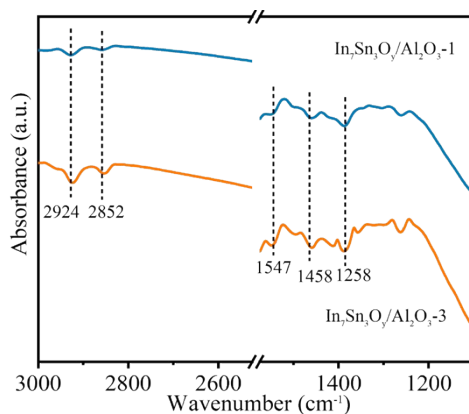

**Fig. S12** FT-IR spectra of catalysts after reaction:  $\text{In}_7\text{Sn}_3\text{O}_y/\text{Al}_2\text{O}_3$ -x (x: reaction-regeneration cycles times).

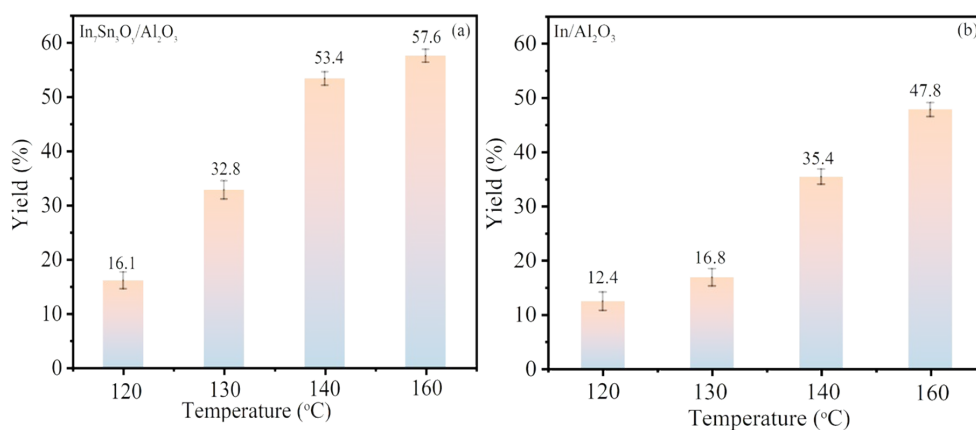

**Fig. S13** MLA yield on  $\text{In}_7\text{Sn}_3\text{O}_y/\text{Al}_2\text{O}_3$  (a) and  $\text{In}/\text{Al}_2\text{O}_3$  (b) catalysts.

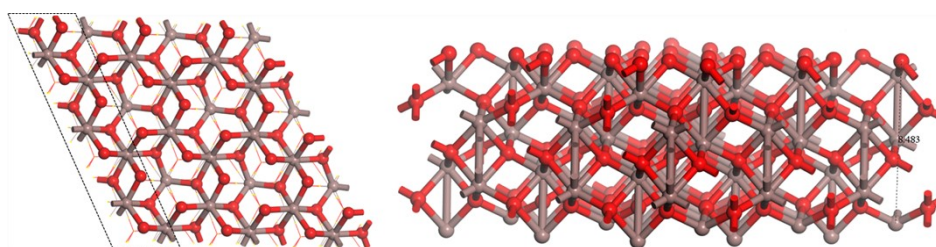

**Fig. S14** Models of  $\text{In}_2\text{O}_3(222)$ .

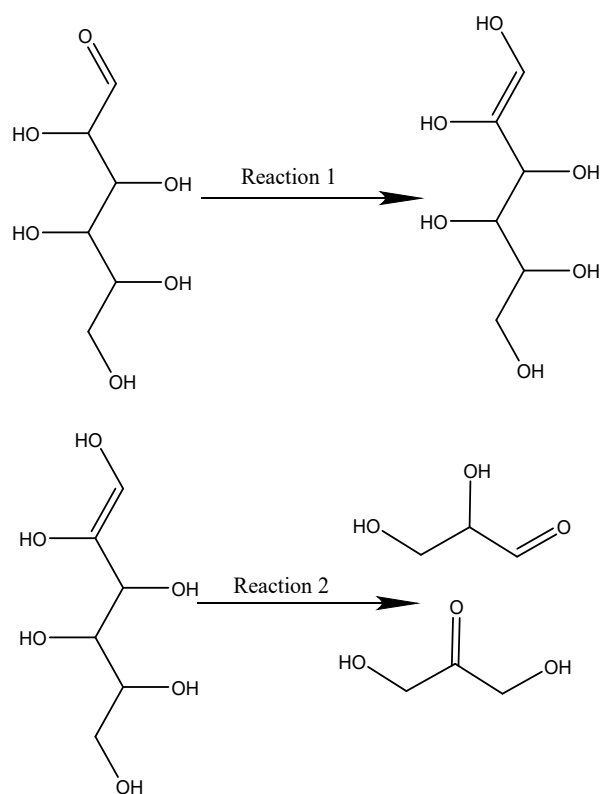

**Fig. S15** The reaction pathway for DFT calculations (Reaction 1: Conversion of glucose to enol; Reaction 2: Conversion of enol to glyceraldehyde and dihydroxy acetone;).

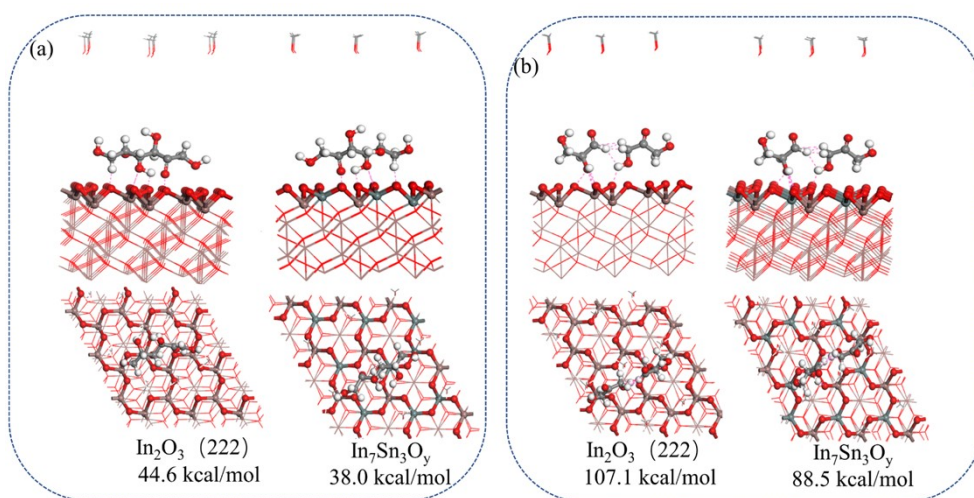

**Fig. S16** (a) Energies of glucose forming enol on the  $\text{In}_2\text{O}_3$  (222) and  $\text{In}_3\text{Sn}_7\text{O}_y$  (kcal/mol), (b) energies of enol to glyceraldehyde and dihydroxy acetone on the  $\text{In}_2\text{O}_3$  (222) and  $\text{In}_3\text{Sn}_7\text{O}_y$  models (kcal/mol). (Color code: red is O, white is H, gray is C, brown is In, and cyan is Sn.).

## References

1. X. Wang, Y. Song, C. Huang, F. Liang and B. Chen, Lactic Acid Production from Glucose over



- Polymer Catalysts in Aqueous Alkaline Solution under Mild Conditions, *Green Chem.*, 2014, **16**, 4234-4240.
2. X. Yang, L. Yang, W. Fan and H. Lin, Effect of Redox Properties of LaCoO<sub>3</sub> Perovskite Catalyst on Production of Lactic Acid from Cellulosic Biomass, *Catal. Today*, 2016, **269**, 56-64.
  3. L. Li, F. Shen, R. L. Smith and X. Qi, Quantitative Chemocatalytic Production of Lactic Acid from Glucose under Anaerobic Conditions at Room Temperature, *Green Chem.*, 2017, **19**, 76-81.
  4. M. S. Holm, S. Saravanamurugan and E. Taarning, Conversion of Sugars to Lactic Acid Derivatives Using Heterogeneous Zeolite Catalysts, *Science*, 2010, **328**, 602-605.
  5. M. S. Holm, Y. J. Pagán-Torres, S. Saravanamurugan, A. Riisager, J. A. Dumesic and E. Taarning, Sn-Beta Catalysed Conversion of Hemicellulosic Sugars, *Green Chem.*, 2012, **14**, 702-706.
  6. X. Yang, Y. Liu, X. Li, J. Ren, L. Zhou, T. Lu and Y. Su, Synthesis of Sn-Containing Nanosized Beta Zeolite As Efficient Catalyst for Transformation of Glucose to Methyl Lactate, *ACS Sustain. Chem. Eng.*, 2018, **6**, 8256-8265.
  7. B. Tang, S. Li, W.-C. Song, E.-C. Yang, X.-J. Zhao, N. Guan and L. Li, Fabrication of Hierarchical Sn-Beta Zeolite as Efficient Catalyst for Conversion of Cellulosic Sugar to Methyl Lactate, *ACS Sustain. Chem. Eng.*, 2020, **8**, 3796-3808.
  8. J. Zhang, L. Wang, G. Wang, F. Chen, J. Zhu, C. Wang, C. Bian, S. Pan and F.-S. Xiao, Hierarchical Sn-Beta Zeolite Catalyst for the Conversion of Sugars to Alkyl Lactates, *ACS Sustain. Chem. Eng.*, 2017, **5**, 3123-3131.
  9. X. Yang, J. Bian, J. Huang, W. Xin, T. Lu, C. Chen, Y. Su, L. Zhou, F. Wang and J. Xu, Fluoride-free and Low Concentration Template Synthesis of Hierarchical Sn-Beta Zeolites: Efficient Catalysts for Conversion of Glucose to Alkyl Lactate, *Green Chem.*, 2017, **19**, 692-701.
  10. S. Yamaguchi, M. Yabushita, M. Kim, J. Hirayama, K. Motokura, A. Fukuoka and K. Nakajima, Catalytic Conversion of Biomass-Derived Carbohydrates to Methyl Lactate by Acid-Base Bifunctional  $\gamma$ -Al<sub>2</sub>O<sub>3</sub>, *ACS Sustain. Chem. Eng.*, 2018, **6**, 8113-8117.
  11. Y. Xiao, S. Xu, W. Zhang, J. Li and C. Hu, One-pot Chemo-catalytic Conversion of Glucose to Methyl Lactate over In/ $\gamma$ -Al<sub>2</sub>O<sub>3</sub> Catalyst, *Catal. Today*, 2021, **365**, 249-256.
  12. Liu and Xinsheng, DRIFTS Study of Surface of  $\gamma$ -Alumina and Its Dehydroxylation, *J. Phys. Chem. C*, 2008, **112**, 5066-5073.

### Abbreviation Index:

methyl lactate:MLA

Lewis acid sites:LAS

coordinatively unsaturated sites:CUS

polylactic acid:PLA

lactic acid:LA

zeolite Beta:BEA

dealumination of BEA zeolite:deAl-BEA

In-Sn oxide:ITO

pyridine:Py

acetonitrile-d<sub>3</sub>:CD<sub>3</sub>CN

ultraviolet-visible:UV-vis

Transmission electron microscopy:TEM

selected area electron diffraction:SAED

Scanning transmission electron microscope-high angle annular dark field:STEM-HAADF

X-ray energy dispersive spectroscopy:EDS

Barret-Joyner-Halenda:BJH

X-ray photoelectron spectra:XPS

binding energies:BE

thermogravimetric analysis:TGA

Density Functional Theory:DFT  
generalized gradient approximation:GGA  
Perdew Burke Ernzerhof:PBE  
gas chromatograph:GC  
flame ionization detector:FID  
tin containing zeolite Beta:Sn-BEA  
glyceraldehyde:GLY  
dihydroxyacetone:DHA  
tetrahedrally-coordinated  $M^{n+}$ : ( $M^{IV}$ )  
octahedrally-coordinated  $M^{n+}$ : ( $M^{VI}$ )  
penta-coordinated  $M^{n+}$ : ( $M^V$ )
